# Supplementary material for: Development, Mechanical Performance, and Ex Vivo Porcine Eye Biomechanical Validation of a 3D-Printed Schepens Scleral Depressor
Source: Research Square preprint supplement (doi:10.21203/rs.3.rs-8242729/v1), 2025-12-05
Supplement: Supplementary file 1 [file 76a4ea081333985d08602441.docx]

**Supplemental file – 3D models (STL)**

Scleral Depressor:

<https://www.dropbox.com/scl/fi/llol8t3qa4dr97163cmux/scleral-depressor-model.stl.zip?rlkey=axqd1qfvutfo2bb3es8yn4i83&st=4wm1qt8z&dl=0>

Ex vivo porcine eye model experiment – height adjusted support

<https://www.dropbox.com/scl/fi/42e6hrfl6n3li7qqsdsqn/height-adjusted-support.stl.zip?rlkey=vpoiux2bl7wwixlqbrhmdumvh&st=lo7p7rm3&dl=0>
